# Supplementary material
Source: PubMed Central journal article supplement (PMC5310714)
Supplement: NIHMS476885-supplement-Suppl.pdf [file NIHMS476885-supplement-Suppl.pdf]

## **SUPPLEMENTAL ONLINE-ONLY CONTENT**

### *Methods- Pre-Specified Dose Modification*

Cetuximab was to be reduced by one dose level (to 200, 100, 75, or 50 mg/m<sup>2</sup>) for grade 3/4 fatigue, paronychia, mucositis/stomatitis, headache during the cetuximab infusion, or any other grade 3 nonhematologic toxicity, grade 2 thrombocytopenia, and grade 4 neutropenia (or grade 3 neutropenia lasting >1 week), whereas erlotinib was to be reduced by one dose level (to 100 or 75 mg/day) for grade 3/4 diarrhea, nausea/vomiting, mucositis/stomatitis, or other grade 3 nonhematologic toxicities. In the event of grade 3/4 rash, treatment was omitted for 1-2 weeks and reinitiated at the same dose level following improvement. Each subsequent recurrence of grade 3/4 rash required cetuximab dose reduction, both cetuximab and erlotinib dose reduction, and finally cetuximab discontinuation. Both drugs were discontinued if grade 3/4 rash did not improve, or in the event of grade 3/4 infusion reactions, other grade 4 nonhematologic toxicity, grade 4 thrombocytopenia, or confirmation of interstitial lung disease.

### *Patient Disposition and Demographics*

Of the 3 untreated patients, 2 did not have bi-dimensionally measurable disease and the other had a concurrent malignancy.

### *Treatment Exposure*

The majority of therapy discontinuations were for reason of disease progression (n=9; 40.9%), death due to tumor-related disease progression (n=2; 9.1%), or study drug-related toxicity (n=8; 36.4%).

One patient with stable disease that remained on therapy at the time of trial closure continued to receive treatment post study.

### *Safety*

Three patients—all in the third dose level cohort—died of their disease (tumor-related disease progression) within 30 days after receiving the last dose of study treatment, and 2 additional patients died for the same reason at 33 and 67 days after their last dose, respectively.
